# Supplementary material
Source: PubMed Central journal article supplement (PMC3939361)
Supplement: NIHMS56217-supplement-1.pdf [file NIHMS56217-supplement-1.pdf]

**Supplementary Data 1. Maximum likelihood phylogeny of 1,035 *M. tuberculosis* isolates based on 32,445 variable sites.**

The phylogeny illustrated in Figure 2 is provided in Newick format to show branch bootstrap support values.

*see additional file*

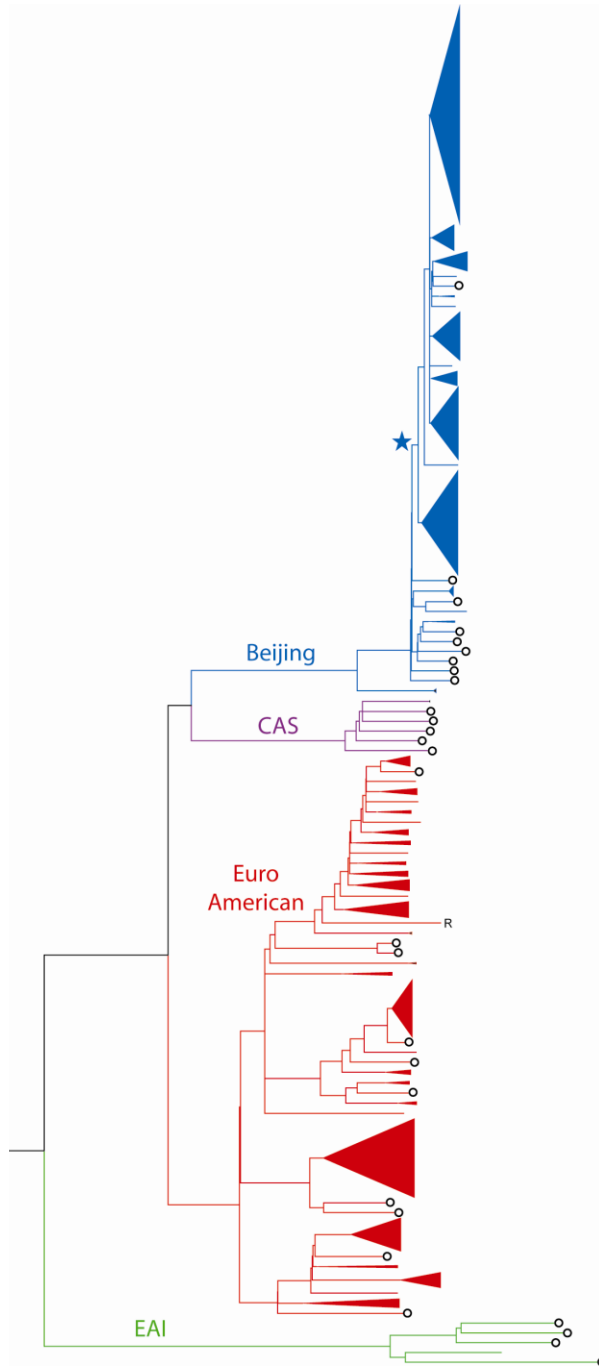

**Supplementary Figure 1. Distribution of Samara isolates relative to global collection**

The phylogeny in Figure 2 is illustrated with all clades that contained only Samaran or UK XDR isolates collapsed. The ancestral node of the Beijing East European sublineage is indicated with a star. Isolates from the UK, representing global diversity, are marked with white circles. The position of the reference sequence, H37Rv, is marked 'R'.

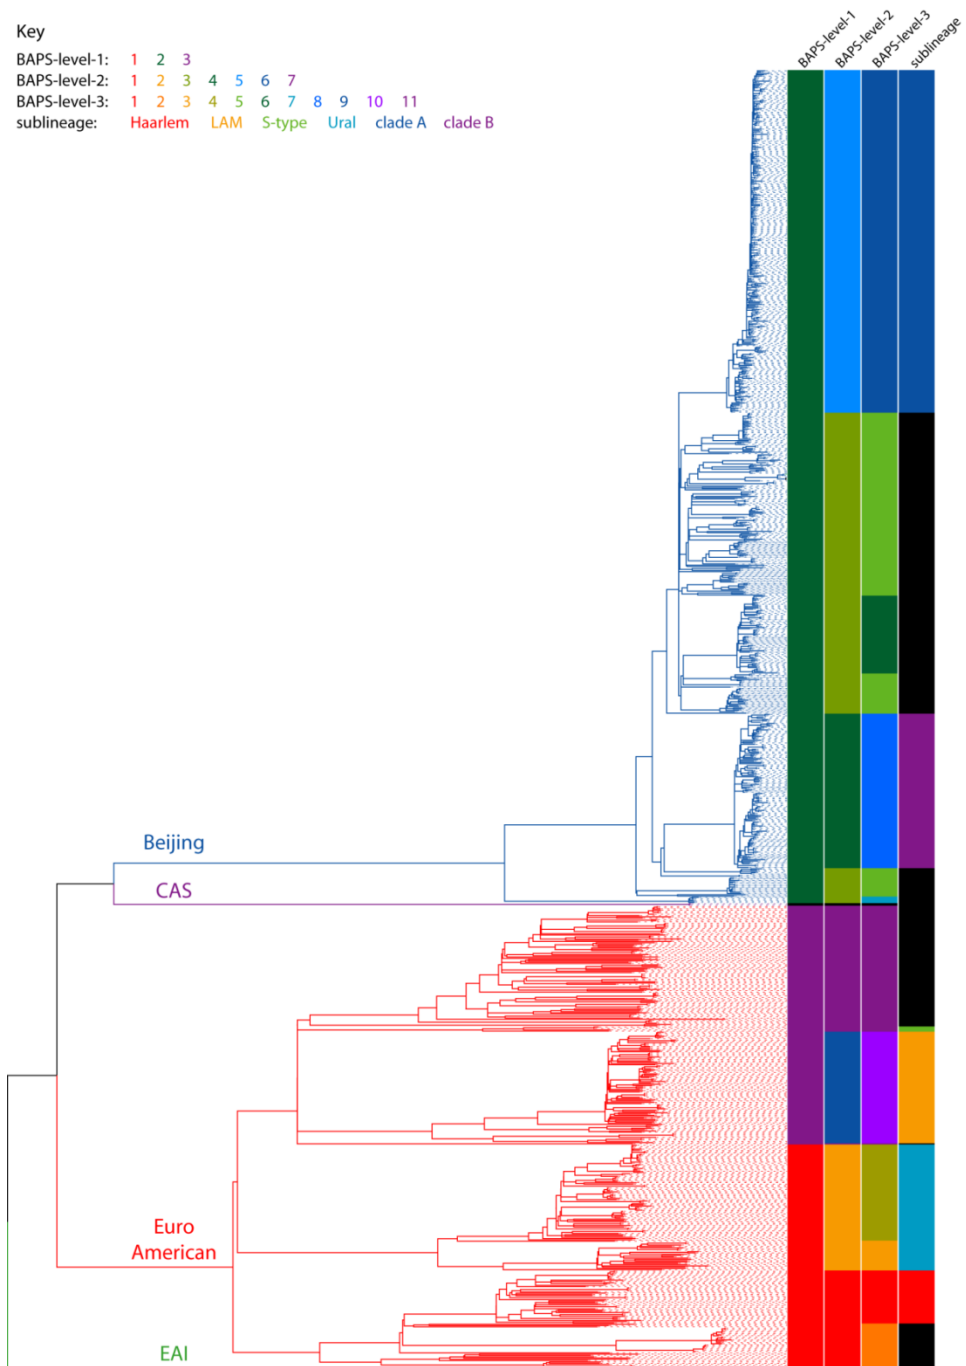

**Supplementary Figure 2. Population genetic analysis**

Genetic structuring of the data was investigated using hierBAPS, which delineates the population using nested clustering. The estimated mode of the posterior distribution had 3, 7 and 11 clusters at levels 1-3 of the hierarchy, respectively. All clusters in the mode were significantly supported when compared against alternative partitions (posterior probability of any cluster at least 100-fold higher than for the alternative). Sublineages are defined in the text.

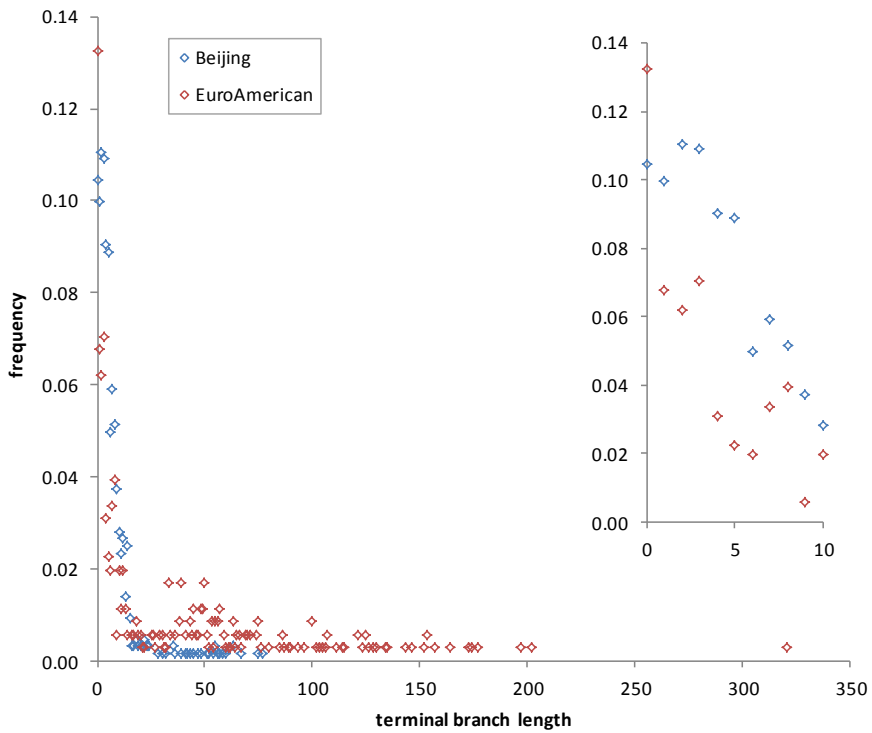

**Supplementary Figure 3. Terminal branch lengths of Beijing versus EuroAmerican isolates**

The number of SNPs between each isolate and its last common ancestor was determined from the phylogeny illustrated in Figure 2. The frequency of each distance was calculated and corrected for the number of isolates in the lineage. All branch lengths are shown in the main panel and those less than 10 SNPs in the inset.

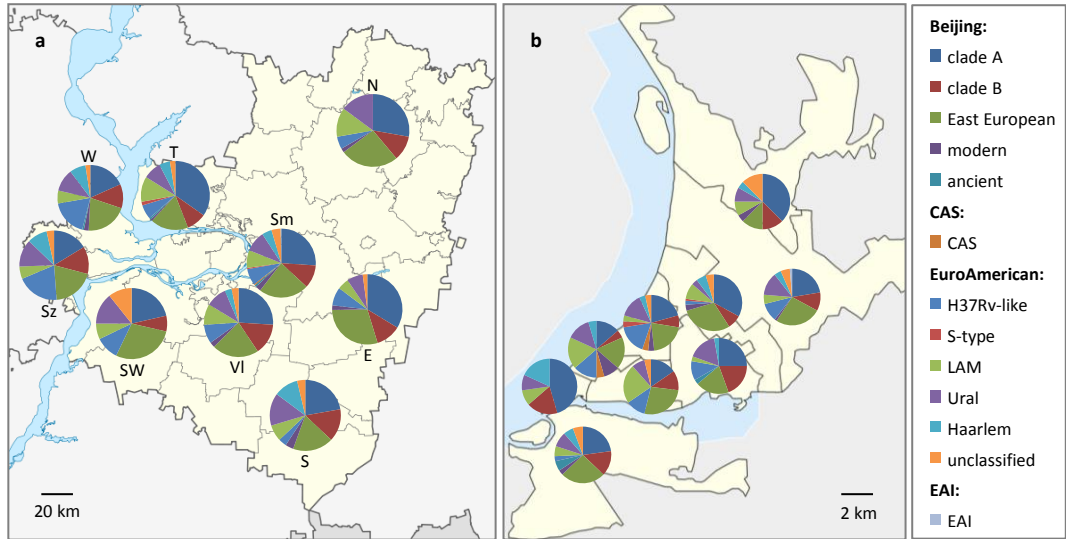

**Supplementary Figure 4. Distribution of sublineages across Samara**

The geographic origin of the sequenced patient isolates is illustrated. Samara (a) is divided into regions: North (N), South (S), East (E), Southwest (SW) and West (W, West of the river Volga); cities: Samara City (Sm), Togliatti (T) and Syzran (Sz); and the region surrounding Samara City (Volzhskyy, VI). Samara City (b) is divided into 9 districts.

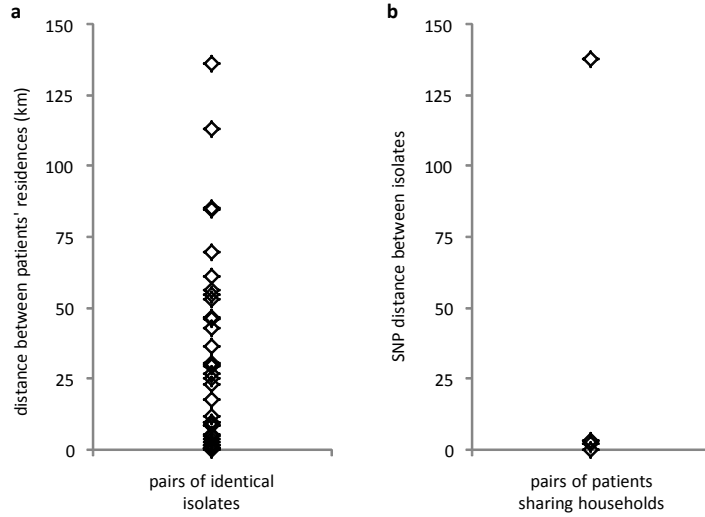

**Supplementary Figure 5. Geographic versus genetic distance between isolates**

a) The distance between the home addresses of patients sharing identical isolates. Where more than two isolates were identical, the distance to the geographically closest isolate is shown. b) The number of SNPs separating isolates from patients sharing households.

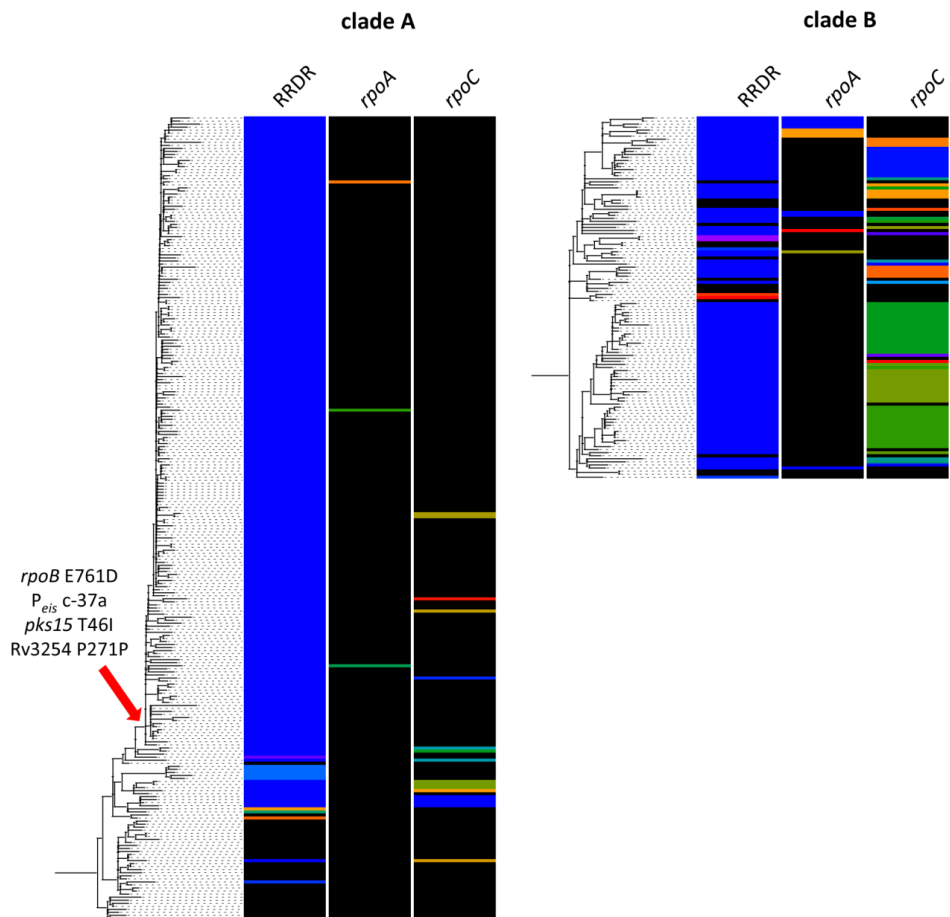

**Supplementary Figure 6. Distribution of *rpoAC* compensatory mutations in clades A and B**

The phylogenies of clades A and B are depicted on the left of each panel. Colored bands represent different polymorphisms. The first column shows nsSNPs in the rifampicin resistance determining region of *rpoB* and the right two columns nsSNPs in *rpoAC*. The genotypes illustrated are provided in full in Supplementary Table 4. The ancestral node of the clade with a significant absence of *rpoAC* nsSNPs is marked with an arrow. The four SNPs on this branch are shown.

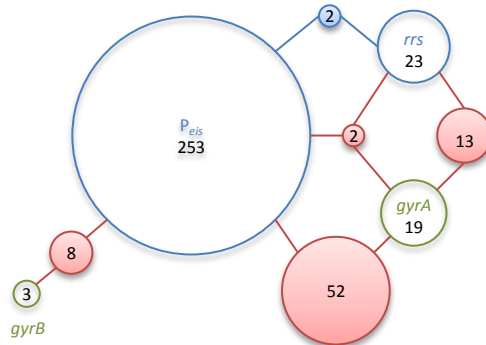

**Supplementary Figure 7. Prevalence and co-occurrence of mutations conferring an XDR genotype**

The number of isolates harbouring genotypes conferring resistance to fluoroquinolones (green) or second-line injectables (blue) are depicted as empty circles. Filled circles show the number of isolates carrying more than one of these mutations. Red filled circles are XDR.



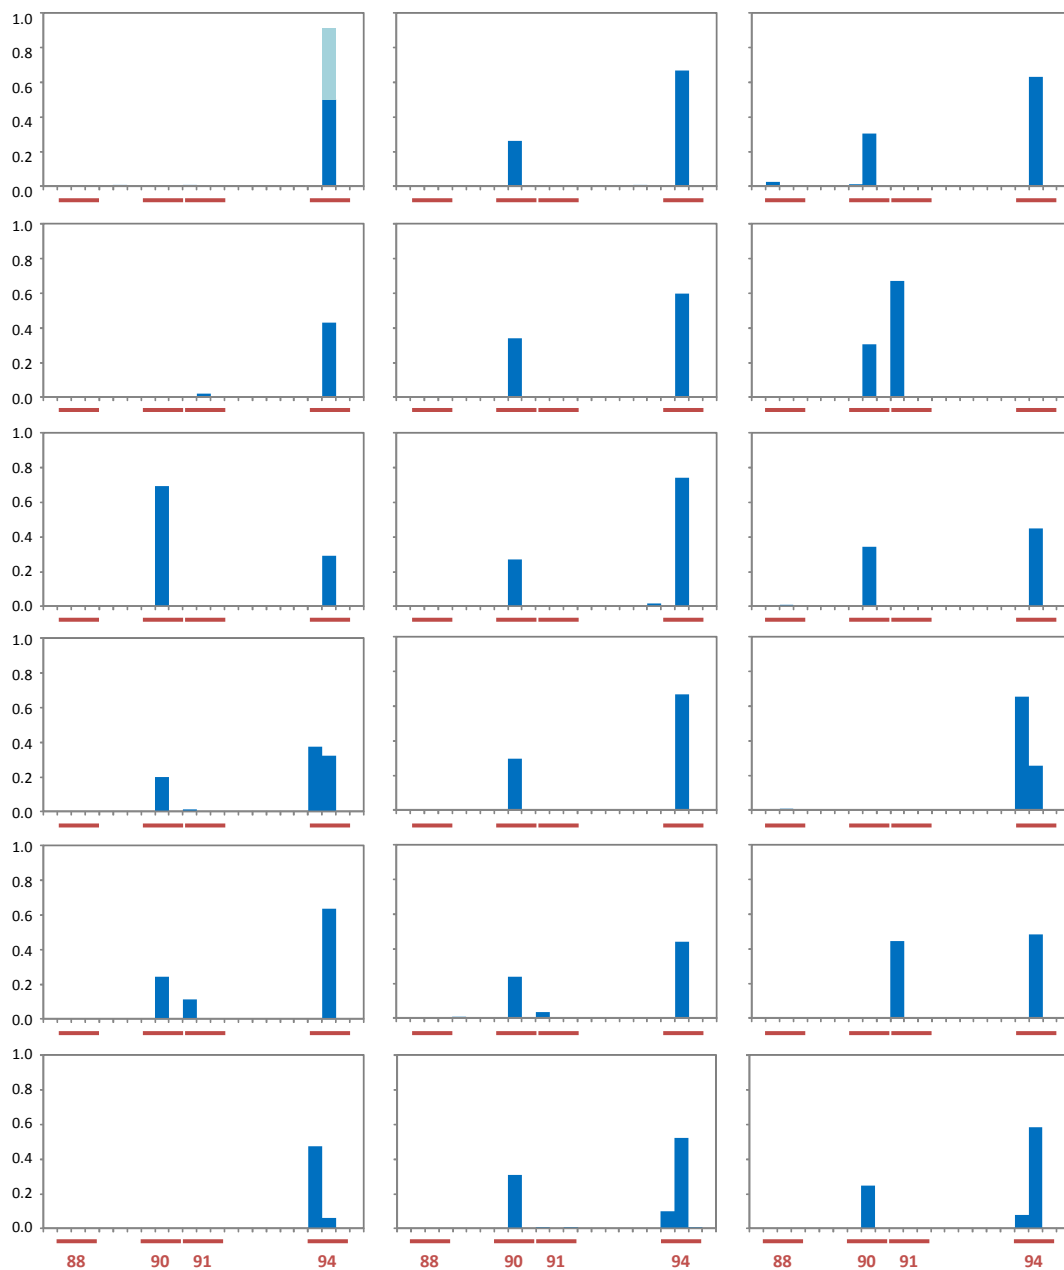

**Supplementary Figure 8. Heterogeneity at the *gyrA* QRDR locus**

Each graph represents an isolate with ambiguous base calls between codons 88 to 94 in *GyrA*. The proportion of reads with alternate basecalls at each site are shown. The isolate depicted in the top left graph had two alternate alleles at one site.

**PncA**

100

```

MRALIIVVQNDFCEGGSLAVTGGALARAISDYLAEAADYHHVVAKDFHIDFGDHFSGTPDYSSSWPPHCVSGTFGADFHPSLDTSAIEAVFYKGAYT
EW LGE P AS S P G VAEG Y L L P FG RR S SR P L ES P
  T   G   R   Q   *   C   C R A
                                Q
                                180
GAYSGFEGVDENGTPLLNLRLQRGVDEVVVGIATDHCVRQTAEADAVRNLATRLVLDLITAGVSADTTVAALEEMRTASVELVCSS
TD   E   R   P   GY   TVPG RGPPMT P GMP P I P L W
PC
V
R

```

**GidB**

100

```

MSPIEPAASAI FGPRLGLARRYA EALAGPGVERGLVGPREVGLRWRHLLNCAVIGELLERGD RVVDIGSGAGLPGVPLAIARPDLQVVLEPLLRTEF
S D R I QS W * R A * R W R C
      A G
                                200
LREMVTDLGVAVEIVRGRAEESWVQDQLGGSDAAVSRVAALDKLTKWSMPLIRPNRMLAIKGERAHDEVREHRRVMIASGAVDVVVTCGANYL RPPA
A W PV F C S K
      E R
                                220
TVPFARRGKQIARGSARMASGGTA
T

```

**EthA**

100

```

MTEHLDVVIVGAGISGVSAAWHLQDRCPKTSYAILEKRESMGGTWDLFRYPGIRSDSDMYTLGFRFRPWTGRQAIADGKPILEVYKSTAAMYGIDRHIRF
G * D S C AR R R D *
                                200
HHKVISADWSTAENRWTVHIQSHGTL SALTC EFL CSGYNYDEGYS PRFAGSEDFVGPIIH PQHWPEDLDYDAKNI VIGSGATAVTLV PALADSGAK
Y R S L A S T S
      Y
                                300
HVTMLQRSPTYIVSQPDRD GIAEKLNRLPETMAYTAVRWKNVLRQA VSACQKWPRMRKMFLSLIQRQLPEGYDVRKHFGPHYNPDQRLCLV PNGD
L P L G A V * P L
                                400
LFRAIRHGKVEVVTDTIERFTATGIRLNSGRELPADIIITATGLNLQLFGGATATIDGQQVDITTTMAYKGMMLSGIPNMAYTVGYTNASWTLKADL VSE
I A A * I *
                                480
FVCRLLN MDDNGFD TVVVER PSGDVEERPFMEFTPGYVLRSLDEL PKQGSRT PWRLNQN VLRD IRIRRGKIDDEGLRFAKRPAPVGV
T P S G G

```

**Supplementary Figure 9. Distribution of non-synonymous and nonsense SNPs in three highly variable genes implicated in drug resistance: PncA, GidB and EthA**

The amino acid sequence of the reference is shown; amino acid substitutions are shown below the sequence and stop codons marked with an asterisk. In PncA, residues that comprise the iron binding site (D49, H51, H57, H71) and catalytic triad (C138, D8, K96) are underlined<sup>1</sup>.

**Supplementary Table 1. Comparison of patient data for sequenced sample with the remainder of the population**

**a) All patients <sup>a</sup>**

| Parameter                          | Sequenced |       |     | Non-sequenced |       |     | P     | χ-square | Attributive Risk | 95% confidence interval |
|------------------------------------|-----------|-------|-----|---------------|-------|-----|-------|----------|------------------|-------------------------|
|                                    | Number    | Total | %   | Number        | Total | %   |       |          |                  |                         |
| New case <sup>b</sup>              | 658       | 996   | 66% | 1196          | 1766  | 68% | 0.373 | 0.795    | -0.017           | -0.054 to 0.021         |
| Male                               | 739       | 996   | 74% | 1366          | 1766  | 77% | 0.062 | 3.493    | -0.032           | -0.066 to 0.003         |
| Imprisonment                       | 240       | 991   | 24% | 423           | 1752  | 24% | 0.965 | 0.002    | 0.001            | -0.033 to 0.035         |
| Recreational drug use <sup>c</sup> | 159       | 976   | 16% | 267           | 1744  | 15% | 0.499 | 0.456    | 0.010            | -0.020 to 0.039         |
| Alcohol use <sup>c</sup>           | 180       | 962   | 19% | 278           | 1683  | 17% | 0.152 | 2.056    | 0.022            | -0.009 to 0.053         |
| Homelessness                       | 61        | 994   | 6%  | 102           | 1766  | 6%  | 0.699 | 0.149    | 0.004            | -0.016 to 0.023         |
| Employment                         | 516       | 993   | 52% | 911           | 1748  | 52% | 0.939 | 0.006    | -0.002           | -0.041 to 0.038         |
| HIV-positive                       | 189       | 996   | 19% | 274           | 1766  | 16% | 0.019 | 5.466    | 0.035            | 0.004 to 0.065          |
| MDR                                | 456       | 996   | 46% | 748           | 1766  | 42% | 0.081 | 3.043    | 0.040            | 0.000 to 0.079          |
| XDR                                | 47        | 996   | 5%  | 72            | 1766  | 4%  | 0.425 | 0.636    | 0.006            | -0.010 to 0.023         |

**b) MDR and XDR TB sub-group <sup>d</sup>**

| Parameter                          | Sequenced |       |     | Non-sequenced |       |     | P     | χ-square | Attributive Risk | 95% confidence interval |
|------------------------------------|-----------|-------|-----|---------------|-------|-----|-------|----------|------------------|-------------------------|
|                                    | Number    | Total | %   | Number        | Total | %   |       |          |                  |                         |
| New case <sup>b</sup>              | 232       | 456   | 51% | 390           | 748   | 52% | 0.671 | 0.181    | -0.013           | -0.073 to 0.047         |
| Male                               | 339       | 456   | 74% | 576           | 748   | 77% | 0.294 | 1.102    | -0.027           | -0.079 to 0.025         |
| Imprisonment                       | 115       | 453   | 25% | 213           | 745   | 29% | 0.228 | 1.455    | -0.032           | -0.085 to 0.021         |
| Recreational drug use <sup>c</sup> | 85        | 444   | 19% | 150           | 741   | 20% | 0.646 | 0.211    | -0.011           | -0.059 to 0.037         |
| Alcohol use <sup>c</sup>           | 65        | 439   | 15% | 126           | 718   | 18% | 0.223 | 1.486    | -0.027           | -0.073 to 0.018         |
| Homelessness                       | 24        | 455   | 5%  | 59            | 748   | 8%  | 0.083 | 3.007    | -0.026           | -0.056 to 0.004         |
| Employment                         | 236       | 455   | 52% | 340           | 743   | 46% | 0.040 | 4.217    | 0.061            | 0.001 to 0.121          |
| HIV-positive                       | 93        | 456   | 20% | 130           | 748   | 17% | 0.191 | 1.707    | 0.030            | -0.017 to 0.078         |

**c) HIV-positive sub-group <sup>e</sup>**

| Parameter                          | Sequenced |       |     | Non-sequenced |       |     | P     | χ-square | Attributive Risk | 95% confidence interval |
|------------------------------------|-----------|-------|-----|---------------|-------|-----|-------|----------|------------------|-------------------------|
|                                    | Number    | Total | %   | Number        | Total | %   |       |          |                  |                         |
| New case <sup>b</sup>              | 122       | 189   | 65% | 182           | 274   | 66% | 0.677 | 0.174    | -0.019           | -0.111 to 0.074         |
| Male                               | 138       | 189   | 73% | 214           | 274   | 78% | 0.208 | 1.588    | -0.051           | -0.135 to 0.034         |
| Imprisonment                       | 66        | 189   | 35% | 94            | 273   | 34% | 0.914 | 0.012    | 0.005            | -0.088 to 0.098         |
| Recreational drug use <sup>c</sup> | 117       | 179   | 65% | 150           | 263   | 57% | 0.079 | 3.089    | 0.083            | -0.013 to 0.180         |
| Alcohol use <sup>c</sup>           | 35        | 180   | 19% | 38            | 261   | 15% | 0.175 | 1.840    | 0.049            | -0.028 to 0.125         |
| Homelessness                       | 17        | 187   | 9%  | 21            | 274   | 8%  | 0.584 | 0.299    | 0.014            | -0.042 to 0.071         |
| Employment                         | 70        | 187   | 37% | 89            | 274   | 32% | 0.272 | 1.206    | 0.050            | -0.044 to 0.143         |
| MDR                                | 93        | 189   | 49% | 130           | 274   | 47% | 0.709 | 0.139    | 0.018            | -0.079 to 0.115         |
| XDR                                | 12        | 189   | 6%  | 15            | 274   | 5%  | 0.693 | 0.156    | 0.009            | -0.040 to 0.057         |

<sup>a</sup> no significant differences in any patient characteristics apart from HIV positivity

<sup>b</sup> versus previously treated

<sup>c</sup> including using in the past

<sup>d</sup> no significant differences in any patient characteristics apart from employment status

<sup>e</sup> no significant differences

**Supplementary Table 2. Comparison of sublineage distribution between the isolated Western region and the rest of Samara**

| Lineage      | Sublineage/ Clade         | West       |            |           | Rest       |            |           | Unknown   | P      |
|--------------|---------------------------|------------|------------|-----------|------------|------------|-----------|-----------|--------|
|              |                           | Number     | Proportion | 95% CI    | Number     | Proportion | 95% CI    | Number    |        |
| Beijing      | clade A                   | 23         | 18.3%      | 12.0-26.1 | 226        | 27.7%      | 24.7-30.9 | 15        | 0.025  |
| Beijing      | clade B                   | 15         | 11.9%      | 6.8-18.9  | 92         | 11.3%      | 9.2-13.7  | 12        | 1.055  |
| Beijing      | other East European       | 26         | 20.6%      | 13.9-28.8 | 194        | 23.8%      | 20.9-26.9 | 12        | 0.867  |
| Beijing      | other modern              | 3          | 2.4%       | 0.5-6.8   | 17         | 2.1%       | 1.2-3.3   | 2         | 1.141  |
| Beijing      | ancient                   | 1          | 0.8%       | 0.02-4.3  | 4          | 0.5%       | 0.1-1.3   | 0         | 0.663  |
| CAS          | -                         | 0          | 0.0%       | 0-2.9     | 2          | 0.2%       | 0.03-0.9  | 0         | 0.578  |
| EuroAmerican | H37Rv-like <sup>a</sup>   | 23         | 18.3%      | 11.9-26.1 | 63         | 7.7%       | 6.0-9.8   | 4         | <0.001 |
| EuroAmerican | S-type                    | 0          | 0.0%       | 0-2.9     | 4          | 0.5%       | 0.1-1.3   | 0         | 0.431  |
| EuroAmerican | LAM                       | 8          | 6.3%       | 2.8-12.1  | 73         | 9.0%       | 7.1-11.1  | 5         | 0.331  |
| EuroAmerican | Ural                      | 14         | 11.1%      | 6.2-17.9  | 79         | 9.7%       | 7.8-11.9  | 4         | 0.620  |
| EuroAmerican | Haarlem                   | 10         | 7.9%       | 3.9-14.1  | 29         | 3.6%       | 2.4-5.1   | 2         | 0.022  |
| EuroAmerican | unclassified <sup>b</sup> | 3          | 2.4%       | -         | 31         | 3.8%       | -         | 3         | -      |
| EAI          | -                         | 0          | 0.0%       | 0-2.9     | 1          | 0.1%       | 0-0.7     | 0         | 0.694  |
| <b>Total</b> |                           | <b>126</b> |            |           | <b>815</b> |            |           | <b>59</b> |        |

<sup>a</sup> The H37Rv-like sublineage refers to the clade containing the reference sequence (Figure 2)

<sup>b</sup> Diverse strains that are not part of any sublineage

**Supplementary Table 3. Genetic distance between UK XDR isolates**

| UK Isolate | Patient country of birth | Closest related isolate |                              |                                            |
|------------|--------------------------|-------------------------|------------------------------|--------------------------------------------|
|            |                          | SNP distance            | Patient country of residence | Phylogenetic group                         |
| 114060062  | Lithuania                | 16                      | Estonia                      | Beijing, East European sublineage, cladeB  |
| 112260020  | Lithuania                | 35                      | Russia                       | Beijing, East European sublineage, cladeB  |
| 111880072  | Latvia                   | 13                      | Russia                       | Beijing, East European sublineage, clade A |
| 112460232  | Latvia                   | 26                      | Russia                       | Beijing, East European sublineage          |
| 114540002  | China                    | 154                     | UK                           | Beijing                                    |

**Supplementary Table 4. Polymorphisms at drug resistance loci**

Isolates are listed in the order of the phylogenetic tree shown in Figure 3. Amino acid substitutions are shown in upper case. Nucleotide substitutions in intergenic regions and rRNA genes are in lower case. Ambiguous basecalls are marked 'n'. Nucleotide positions in promoter regions 'P', are given relative to the start codon. Insertions (ins) and deletions (del) are given with their position in the gene, followed by size in brackets. Where deletions span all or most of the locus they are marked 'lg' (large). Columns labelled RIF (rifampicin), INH (isoniazid), PZA (pyrazinamide), EMB (ethambutol), STR (streptomycin), CAP (capreomycin), AMI (amikacin), MOX (moxifloxacin), OFL (ofloxacin) and PRO (prothionamide) show phenotypic susceptibility results: resistant (R), sensitive (S).

*see additional file*

**Supplementary Table 5. Correlation of polymorphisms at drug resistance loci with resistance phenotypes <sup>a</sup>**

**a) Rifampicin**

| <i>rpoB</i> RRDR | Sensitive | Resistant  |
|------------------|-----------|------------|
| L430P            | 10        | 0          |
| L430P;D435G      | 0         | 1          |
| L430P;M434V      | 1         | 0          |
| Q432P            | 1         | 0          |
| D435G            | 1         | 0          |
| D435V            | 0         | 6          |
| D435Y            | 2         | 0          |
| D435Y;G456S      | 0         | 1          |
| del1292(12)      | 0         | 2          |
| H445D            | 0         | 4          |
| H445L            | 0         | 4          |
| H445N            | 1         | 0          |
| H445N;L452P      | 0         | 3          |
| H445R            | 0         | 1          |
| H445Y            | 0         | 3          |
| S450L            | 7         | 369        |
| S450P            | 0         | 1          |
| S450W            | 0         | 2          |
| L452P            | 2         | 1          |
| -                | 416       | 48         |
| <b>any RRDR</b>  | <b>25</b> | <b>398</b> |

**b) Pyrazinamide**

| P <sub><i>pncA</i></sub> | <i>pncA</i> | Sensitive | Resistant |
|--------------------------|-------------|-----------|-----------|
| c-13a                    | -           | 1         | 0         |
| t-11a                    | -           | 1         | 0         |
| t-11c                    | -           | 3         | 7         |
| t-11g                    | -           | 2         | 3         |
| a-7g                     | -           | 0         | 3         |
| -                        | A3E         | 0         | 1         |
| -                        | L4W         | 0         | 1         |
| -                        | I6L         | 120       | 8         |
| -                        | I6T         | 0         | 1         |
| -                        | V7G         | 1         | 4         |
| -                        | D8E         | 0         | 2         |
| -                        | Q10P        | 0         | 0         |
| -                        | D12A        | 0         | 1         |
| -                        | D12G        | 1         | 0         |
| -                        | F13S        | 1         | 0         |
| -                        | G17S        | 1         | 0         |
| -                        | L27P        | 1         | 0         |
| -                        | ins102(1)   | 0         | 1         |
| -                        | ins122(1)   | 0         | 1         |
| -                        | del127(131) | 0         | 1         |
| -                        | V44G        | 0         | 1         |
| -                        | A46V        | 1         | 0         |
| -                        | T47A        | 2         | 1         |
| -                        | K48E        | 1         | 1         |
| -                        | D49G        | 0         | 1         |
| -                        | del150(1)   | 0         | 1         |
| -                        | H51Y        | 0         | 0         |
| -                        | H51P        | 1         | 1         |
| -                        | H51R        | 2         | 0         |
| -                        | H51Q        | 0         | 1         |
| -                        | P54L        | 1         | 0         |
| -                        | P54Q        | 0         | 3         |
| -                        | F58L        | 2         | 0         |
| -                        | del186(1)   | 0         | 3         |
| -                        | ins193(7)   | 0         | 1         |
| -                        | S65P        | 1         | 0         |
| -                        | S67P        | 0         | 2         |
| -                        | W68G        | 1         | 6         |
| -                        | W68R        | 1         | 2         |
| -                        | W68*        | 0         | 0         |
| -                        | H71R        | 3         | 1         |
| -                        | H71Q        | 0         | 1         |
| -                        | C72R        | 0         | 1         |
| -                        | G78S        | 0         | 0         |
| -                        | ins234(1)   | 0         | 0         |
| -                        | F81C        | 0         | 1         |
| -                        | F81S        | 1         | 0         |
| -                        | H82R        | 0         | 3         |
| -                        | L85P        | 1         | 0         |
| -                        | ins257(2)   | 1         | 1         |
| -                        | F94L        | 1         | 1         |
| -                        | F94C        | 1         | 0         |
| -                        | K96E        | 0         | 3         |
| -                        | K96R        | 0         | 1         |

| P <sub><i>pncA</i></sub> | <i>pncA</i>                        | Sensitive | Resistant |
|--------------------------|------------------------------------|-----------|-----------|
| -                        | G97S                               | 0         | 3         |
| -                        | T100A                              | 0         | 1         |
| -                        | T100P                              | 0         | 2         |
| -                        | A102P                              | 1         | 0         |
| -                        | A102T                              | 0         | 1         |
| -                        | A102R                              | 1         | 0         |
| -                        | A102V                              | 1         | 0         |
| -                        | Y103D                              | 0         | 1         |
| -                        | Y103C                              | 1         | 0         |
| -                        | G108E                              | 0         | 0         |
| -                        | del333(1)                          | 0         | 1         |
| -                        | del342(1)                          | 0         | 2         |
| -                        | ins350(1)                          | 0         | 2         |
| -                        | W119R                              | 0         | 1         |
| -                        | R123P                              | 0         | 0         |
| -                        | ins383(2)                          | 0         | 1         |
| -                        | V128G                              | 1         | 6         |
| -                        | D129Y                              | 0         | 1         |
| -                        | ins392(1)                          | 0         | 1         |
| -                        | ins392(2)                          | 0         | 4         |
| -                        | I133T                              | 0         | 1         |
| -                        | A134V                              | 0         | 1         |
| -                        | T135P                              | 0         | 2         |
| -                        | T135S                              | 1         | 0         |
| -                        | D136Y                              | 0         | 3         |
| -                        | D136G                              | 1         | 0         |
| -                        | ins408(1)                          | 1         | 3         |
| -                        | C138R                              | 0         | 2         |
| -                        | V139A                              | 6         | 1         |
| -                        | V139G                              | 1         | 0         |
| -                        | R140P                              | 0         | 1         |
| -                        | Q141P                              | 0         | 1         |
| -                        | T142M                              | 0         | 0         |
| -                        | A143T                              | 1         | 0         |
| -                        | A146P                              | 0         | 1         |
| -                        | A146V                              | 0         | 1         |
| -                        | R154G                              | 0         | 1         |
| -                        | V155M                              | 0         | 2         |
| -                        | V155G                              | 0         | 1         |
| -                        | L156P                              | 0         | 1         |
| -                        | T160P                              | 0         | 1         |
| -                        | ins481(1)                          | 0         | 0         |
| -                        | T168I                              | 2         | 0         |
| -                        | del515(2)                          | 0         | 0         |
| -                        | L172P                              | 1         | 1         |
| -                        | V180L                              | 0         | 0         |
| -                        | V180G                              | 0         | 4         |
| -                        | L182W                              | 1         | 0         |
| -                        | del(Ig)                            | 1         | 3         |
| -                        | -                                  | 537       | 46        |
| -                        | <b>any promoter SNP</b>            | <b>7</b>  | <b>14</b> |
| -                        | <b>any KO mutation<sup>b</sup></b> | <b>3</b>  | <b>26</b> |
| -                        | <b>nsSNP (excluding I6L)</b>       | <b>44</b> | <b>82</b> |

## Correlation of polymorphisms at drug resistance loci with resistance phenotypes (cont.)

### c) Streptomycin

| <i>rpsL</i> | <i>rrs<sub>str</sub></i> | <i>gidB</i> | Sensitive | Resistant | <i>rpsL</i> | <i>rrs<sub>str</sub></i> | <i>gidB</i>                              | Sensitive | Resistant |
|-------------|--------------------------|-------------|-----------|-----------|-------------|--------------------------|------------------------------------------|-----------|-----------|
| K43R        | -                        | -           | 5         | 218       | -           | -                        | del142(1)                                | 1         | 0         |
| K43R        | c517t                    | -           | 0         | 4         | -           | -                        | C52*                                     | 1         | 0         |
| K43R        | -                        | S149C       | 0         | 2         | -           | -                        | L59R                                     | 0         | 1         |
| K88M        | -                        | -           | 0         | 1         | -           | -                        | ins194(1)                                | 1         | 0         |
| K88R        | -                        | -           | 0         | 48        | -           | -                        | V65A                                     | 2         | 0         |
| -           | a514c                    | -           | 2         | 13        | -           | -                        | G73R                                     | 1         | 0         |
| -           | a514c                    | L44Q        | 0         | 5         | -           | -                        | L79W                                     | 0         | 1         |
| -           | a514t                    | -           | 0         | 1         | -           | -                        | I81R                                     | 2         | 0         |
| -           | c517t                    | -           | 33        | 156       | -           | -                        | R96C;A205T                               | 1         | 1         |
| -           | c517t                    | Y22S        | 0         | 1         | -           | -                        | G109A                                    | 2         | 0         |
| -           | c517t                    | del629(1)   | 0         | 1         | -           | -                        | R116W                                    | 1         | 1         |
| -           | a908c                    | -           | 0         | 1         | -           | -                        | del352(1)                                | 0         | 1         |
| -           | a906g                    | -           | 0         | 1         | -           | -                        | del397(364)                              | 0         | 1         |
| -           | a906g                    | G71*        | 1         | 3         | -           | -                        | R137P                                    | 0         | 1         |
| -           | -                        | del53(1)    | 2         | 3         | -           | -                        | A138V                                    | 1         | 0         |
| -           | -                        | Y22S        | 1         | 1         | -           | -                        | A138E                                    | 0         | 1         |
| -           | -                        | del88(1)    | 2         | 0         | -           | -                        | del414(1)                                | 1         | 0         |
| -           | -                        | E32D        | 1         | 0         | -           | -                        | S149R                                    | 0         | 2         |
| -           | -                        | G34R        | 0         | 1         | -           | -                        | L152S                                    | 1         | 0         |
| -           | -                        | G34A        | 1         | 0         | -           | -                        | E170K                                    | 1         | 0         |
| -           | -                        | del103(1)   | 0         | 2         | -           | -                        | A205T                                    | 1         | 0         |
| -           | -                        | del116(1)   | 0         | 2         | -           | -                        | -                                        | 315       | 39        |
| -           | -                        | V41I        | 1         | 0         | -           | -                        | any <i>rpsL</i>                          | 5         | 273       |
| -           | -                        | V41G        | 1         | 0         | -           | -                        | any <i>rrs</i>                           | 36        | 186       |
| -           | -                        | W45S        | 1         | 0         | -           | -                        | any <i>gidB</i> KO mutation <sup>b</sup> | 12        | 13        |
| -           | -                        | R47W        | 1         | 0         | -           | -                        | any <i>gidB</i> nsSNP                    | 19        | 18        |

### d) Ethambutol

| <i>P<sub>embA</sub></i> | <i>embB</i> | Sensitive | Resistant | <i>P<sub>embA</sub></i> | <i>embB</i>  | Sensitive | Resistant |
|-------------------------|-------------|-----------|-----------|-------------------------|--------------|-----------|-----------|
| c-16a                   | -           | 1         | 0         | -                       | D1024N       | 0         | 2         |
| c-16t                   | -           | 4         | 4         | -                       | M306V;D354A  | 0         | 2         |
| c-15g                   | -           | 1         | 0         | -                       | M306I;Q497R  | 0         | 3         |
| c-11a                   | -           | 0         | 1         | -                       | M306V;D1024N | 0         | 1         |
| c-12t                   | -           | 2         | 2         | c-16t                   | D354A        | 0         | 3         |
| -                       | M306L       | 0         | 4         | c-16t                   | M306I        | 0         | 2         |
| -                       | M306V       | 34        | 63        | c-16a                   | M306I        | 0         | 1         |
| -                       | M306I       | 25        | 16        | c-16a                   | D354A        | 0         | 4         |
| -                       | Y319C       | 3         | 0         | c-16g                   | D354A        | 0         | 1         |
| -                       | Y319S       | 1         | 2         | c-12t                   | M306V        | 0         | 1         |
| -                       | D354A       | 83        | 78        | c-12t                   | D354A        | 0         | 2         |
| -                       | E378A       | 0         | 1         | c-12t                   | G406A        | 0         | 1         |
| -                       | G406A       | 2         | 10        | c-12t                   | Q497R        | 0         | 1         |
| -                       | Q497K       | 2         | 4         | c-8a                    | D354A        | 1         | 5         |
| -                       | G406D       | 11        | 2         | -                       | -            | 443       | 46        |
| -                       | Q497R       | 9         | 10        | any single SNP          | 176          | 199       |           |
| -                       | H1002R      | 1         | 1         | any double SNP          | 1            | 27        |           |

### e) Prothionamide

| <i>P<sub>ethA</sub></i> | <i>ethA</i>  | Sensitive | Resistant | <i>P<sub>ethA</sub></i>                  | <i>ethA</i> | Sensitive | Resistant |
|-------------------------|--------------|-----------|-----------|------------------------------------------|-------------|-----------|-----------|
| a-7g                    | -            | 116       | 56        | -                                        | del769(1)   | 0         | 3         |
| -                       | del104(2627) | 0         | 1         | -                                        | H281P       | 0         | 2         |
| -                       | V17G         | 1         | 1         | -                                        | ins865(1)   | 0         | 1         |
| -                       | W21*         | 0         | 1         | -                                        | del887(1)   | 2         | 0         |
| -                       | del111(1)    | 8         | 16        | -                                        | T314I       | 9         | 3         |
| -                       | G43D         | 1         | 0         | -                                        | P334A       | 2         | 2         |
| -                       | W45*         | 0         | 2         | -                                        | del1011(1)  | 11        | 15        |
| -                       | P51S         | 0         | 3         | -                                        | G343A       | 0         | 2         |
| -                       | M59R         | 3         | 4         | -                                        | Q347*       | 0         | 2         |
| -                       | L62R         | 3         | 0         | -                                        | del1113(1)  | 1         | 0         |
| -                       | W69R;P334A   | 0         | 1         | -                                        | T387I       | 8         | 6         |
| -                       | A76D         | 2         | 1         | -                                        | W391*       | 0         | 1         |
| -                       | K86*         | 1         | 0         | -                                        | del1182(1)  | 0         | 1         |
| -                       | ins282(5)    | 0         | 1         | -                                        | ins1269(1)  | 1         | 0         |
| -                       | C137R        | 1         | 3         | -                                        | ins1293(1)  | 0         | 1         |
| -                       | C137Y        | 0         | 1         | -                                        | L440P       | 4         | 0         |
| -                       | P149S        | 0         | 1         | -                                        | W455G       | 1         | 0         |
| -                       | del480(1)    | 3         | 11        | -                                        | D464G       | 1         | 0         |
| -                       | P164L        | 0         | 1         | -                                        | ins1429(2)  | 2         | 0         |
| -                       | A199S;R239L  | 1         | 0         | -                                        | -           | 78        | 32        |
| -                       | S208L        | 0         | 1         | any <i>ethA</i> KO mutation <sup>b</sup> | 34          | 62        |           |
| -                       | del704(1)    | 1         | 3         | any nsSNP                                | 37          | 32        |           |
| -                       | W256*        | 4         | 4         | promoter SNP                             | 116         | 56        |           |



## Correlation of polymorphisms at drug resistance loci with resistance phenotypes (cont.)

### f) Amikacin and capreomycin

| <i>rrs</i> <sub>III</sub> | amiS capS | amiS capR | amiR capS | amiR capR |
|---------------------------|-----------|-----------|-----------|-----------|
| a1401g                    | 2         | 0         | 4         | 27        |
| c1402t                    | 0         | 1         | 0         | 0         |
| g1484t                    | 0         | 0         | 0         | 1         |
| -                         | 367       | 26        | 14        | 16        |
| any SNP                   | 2         | 1         | 4         | 28        |

### g) Fluoroquinolones (moxifloxacin and ofloxacin)

| <i>gyrA</i> | <i>gyrB</i>           | moxS ofIS | moxR ofIS | moxS ofIR | moxR ofIR |
|-------------|-----------------------|-----------|-----------|-----------|-----------|
| A74S        | -                     | 1         | 0         | 0         | 1         |
| A90V        | -                     | 2         | 0         | 1         | 6         |
| S91P        | -                     | 0         | 0         | 0         | 5         |
| D94A        | -                     | 2         | 1         | 0         | 6         |
| D94G        | -                     | 1         | 0         | 1         | 26        |
| D94N        | -                     | 0         | 0         | 0         | 6         |
| D94Y        | -                     | 0         | 0         | 0         | 3         |
| -           | N499Y                 | 0         | 0         | 0         | 1         |
| -           | N499S                 | 2         | 0         | 0         | 0         |
| -           | E501D                 | 1         | 0         | 0         | 2         |
| -           | D461N                 | 1         | 0         | 0         | 1         |
| -           | A504V                 | 1         | 0         | 0         | 0         |
| -           | A504T                 | 1         | 0         | 0         | 0         |
| -           | -                     | 261       | 24        | 24        | 13        |
|             | any <i>gyrA</i> nsSNP | 6         | 1         | 2         | 53        |
|             | any <i>gyrB</i> nsSNP | 6         | 0         | 0         | 4         |

<sup>a</sup> Dashes indicate a wild-type sequence at that locus

<sup>b</sup> Knockout mutation: large deletion, frameshifting indel or nonsense SNP

**Supplementary Table 6. Summary statistics for correlation of drug resistance genotypes and phenotypes**

| Drug                              | Resistance locus                                  | Mutation  |           | No mutation |           | Sensitivity | Specificity | Positive predictive value | Negative predictive value |
|-----------------------------------|---------------------------------------------------|-----------|-----------|-------------|-----------|-------------|-------------|---------------------------|---------------------------|
|                                   |                                                   | Sensitive | Resistant | Sensitive   | Resistant |             |             |                           |                           |
| Rifampicin                        | <i>rpoB</i> RRDR                                  | 25        | 398       | 416         | 48        | 94.1%       | 89.7%       | 89.2%                     | 94.3%                     |
| Pyrazinamide                      | P <sub><i>pncA</i></sub>                          | 7         | 14        | 734         | 162       | 66.7%       | 81.9%       | 8.0%                      | 99.1%                     |
|                                   | <i>pncA</i> KO mutation                           | 3         | 26        | 738         | 150       | 89.7%       | 83.1%       | 14.8%                     | 99.6%                     |
|                                   | <i>pncA</i> nsSNP (excluding I6L)                 | 75        | 82        | 666         | 94        | 52.2%       | 87.6%       | 46.6%                     | 89.9%                     |
|                                   | <i>pncA</i> I6L                                   | 119       | 8         | 622         | 168       | 6.3%        | 78.7%       | 4.5%                      | 83.9%                     |
| Ethambutol                        | P <sub><i>embA</i></sub>                          | 9         | 28        | 614         | 245       | 75.7%       | 71.5%       | 10.3%                     | 98.6%                     |
|                                   | <i>embB</i>                                       | 172       | 220       | 451         | 53        | 56.1%       | 89.5%       | 80.6%                     | 72.4%                     |
|                                   | P <sub><i>embA</i></sub> or <i>embB</i>           | 176       | 199       | 444         | 73        | 53.1%       | 85.9%       | 73.2%                     | 71.6%                     |
|                                   | P <sub><i>embA</i></sub> / <i>embB</i> double SNP | 1         | 27        | 619         | 245       | 96.4%       | 71.6%       | 9.9%                      | 99.8%                     |
| Streptomycin                      | <i>rpsL</i>                                       | 5         | 273       | 378         | 240       | 98.2%       | 61.2%       | 53.2%                     | 98.7%                     |
|                                   | <i>rrs</i> <sub>str</sub>                         | 36        | 186       | 347         | 327       | 83.8%       | 51.5%       | 36.3%                     | 90.6%                     |
|                                   | <i>rpsL</i> or <i>rrs</i> <sub>str</sub>          | 41        | 455       | 342         | 58        | 91.7%       | 85.5%       | 88.7%                     | 89.3%                     |
|                                   | <i>gidB</i> KO mutation                           | 9         | 13        | 374         | 500       | 59.1%       | 42.8%       | 2.5%                      | 97.7%                     |
|                                   | <i>gidB</i> nsSNP                                 | 19        | 18        | 364         | 495       | 48.6%       | 42.4%       | 3.5%                      | 95.0%                     |
| Prothionamide                     | P <sub><i>ethA</i></sub>                          | 116       | 56        | 149         | 126       | 32.6%       | 54.2%       | 30.8%                     | 56.2%                     |
|                                   | <i>ethA</i> KO mutation                           | 34        | 62        | 231         | 120       | 64.6%       | 65.8%       | 34.1%                     | 87.2%                     |
|                                   | <i>ethA</i> nsSNP                                 | 37        | 32        | 228         | 150       | 46.4%       | 60.3%       | 17.6%                     | 86.0%                     |
| Amikacin/capreomycin <sup>a</sup> | <i>rrs</i> <sub>inj</sub>                         | 2         | 33        | 367         | 56        | 94.3%       | 86.8%       | 37.1%                     | 99.5%                     |
| Fluoroquinolones <sup>b</sup>     | <i>gyrA</i>                                       | 6         | 56        | 267         | 65        | 90.3%       | 80.4%       | 46.3%                     | 97.8%                     |
|                                   | <i>gyrB</i>                                       | 6         | 4         | 267         | 117       | 40.0%       | 69.5%       | 3.3%                      | 97.8%                     |

<sup>a</sup> Classified as resistant if not susceptible to either amikacin or capreomycin

<sup>b</sup> Classified as resistant if not susceptible to either moxifloxacin or ofloxacin

**Supplementary Table 7: Association of mutations at drug resistance loci with Beijing and EuroAmerican lineages**

| Locus                     | Beijing (n=642) |            |           | EuroAmerican (n=355) |            |           | P <sup>a</sup> |
|---------------------------|-----------------|------------|-----------|----------------------|------------|-----------|----------------|
|                           | Number          | Proportion | 95% CI    | Number               | Proportion | 95% CI    |                |
| <i>katG</i>               | 478             | 0.74       | 0.71-0.78 | 107                  | 0.30       | 0.25-0.35 | <0.001         |
| P <sub><i>inhA</i></sub>  | 33              | 0.05       | 0.04-0.07 | 37                   | 0.10       | 0.07-0.14 | 0.002          |
| <i>rpoB</i>               | 430             | 0.67       | 0.63-0.71 | 67                   | 0.19       | 0.15-0.23 | <0.001         |
| P <sub><i>pncA</i></sub>  | 19              | 0.03       | 0.02-0.05 | 2                    | 0.01       | 0.00-0.02 | 0.012          |
| <i>pncA</i>               | 306             | 0.48       | 0.44-0.52 | 29                   | 0.08       | 0.06-0.12 | <0.001         |
| P <sub><i>embA</i></sub>  | 35              | 0.05       | 0.04-0.08 | 6                    | 0.02       | 0.01-0.04 | 0.004          |
| <i>embB</i>               | 408             | 0.64       | 0.60-0.67 | 50                   | 0.14       | 0.11-0.18 | <0.001         |
| <i>rpsL</i>               | 263             | 0.41       | 0.37-0.45 | 51                   | 0.14       | 0.11-0.18 | <0.001         |
| <i>rrs</i> <sub>str</sub> | 244             | 0.38       | 0.34-0.42 | 17                   | 0.05       | 0.03-0.08 | <0.001         |
| <i>gidB</i>               | 16              | 0.02       | 0.01-0.04 | 49                   | 0.14       | 0.10-0.18 | <0.001         |
| <i>rrs</i> <sub>inj</sub> | 33              | 0.05       | 0.04-0.07 | 7                    | 0.02       | 0.01-0.04 | 0.015          |
| P <sub><i>eis</i></sub>   | 299             | 0.47       | 0.43-0.51 | 18                   | 0.05       | 0.03-0.08 | <0.001         |
| <i>gyrA</i>               | 81              | 0.13       | 0.10-0.15 | 5                    | 0.01       | 0.00-0.03 | <0.001         |
| <i>gyrB</i>               | 11              | 0.02       | 0.01-0.03 | 0                    | 0.00       | 0.00-0.01 | 0.010          |
| P <sub><i>ethA</i></sub>  | 215             | 0.33       | 0.30-0.37 | 0                    | 0.00       | 0.00-0.01 | <0.001         |
| <i>ethA</i>               | 176             | 0.27       | 0.24-0.31 | 51                   | 0.14       | 0.11-0.18 | <0.001         |

<sup>a</sup> Mutations at all loci are significantly associated with the Beijing lineage, except P<sub>*inhA*</sub> and *gidB* mutations which are significantly associated with the EuroAmerican lineage

**Supplementary Table 8. Co-occurrence of RpoABC nsSNPs with RRDR genotypes**

| Gene        | Substitution | Isolates/ Cluster | RRDR Genotype of Isolates |       |                | Likelihood<br>Compensatory<br>Mutation <sup>a</sup> |      |
|-------------|--------------|-------------------|---------------------------|-------|----------------|-----------------------------------------------------|------|
|             |              |                   | WT                        | S450L | Other<br>nsSNP |                                                     |      |
| <i>rpoA</i> | G31A/S       | 3,1               | 0                         | 4     | 0              | high                                                |      |
|             | R153W        | 1                 | 1                         | 0     | 0              | low                                                 |      |
|             | K177M        | 1                 | 0                         | 1     | 0              | -                                                   |      |
|             | T181A        | 1                 | 0                         | 1     | 0              | -                                                   |      |
|             | V183G        | 3                 | 0                         | 3     | 0              | -                                                   |      |
|             | E184D        | 1                 | 0                         | 1     | 0              | -                                                   |      |
|             | T187P/A      | 1,1,1,8,4,2,1     | 1                         | 17    | 0              | high                                                |      |
|             | D190G        | 1,1               | 0                         | 2     | 0              | -                                                   |      |
|             | H270N        | 1                 | 1                         | 0     | 0              | low                                                 |      |
|             | L304R        | 1                 | 0                         | 1     | 0              | -                                                   |      |
|             | G305S        | 6                 | 6                         | 0     | 0              | low                                                 |      |
|             | S307L        | 1                 | 0                         | 1     | 0              | -                                                   |      |
|             | <i>rpoC</i>  | G332S/R/C         | 1,1,1                     | 0     | 3              | 0                                                   | high |
|             |              | N416T/S           | 2,1                       | 0     | 3              | 0                                                   | high |
|             |              | S428A             | 2                         | 0     | 2              | 0                                                   | -    |
|             |              | V431M             | 4,1                       | 0     | 5              | 0                                                   | high |
|             |              | G433S/C           | 1,3                       | 0     | 4              | 0                                                   | high |
|             |              | P434R/Q           | 1,1                       | 0     | 2              | 0                                                   | high |
|             |              | K445R             | 1,14                      | 0     | 15             | 0                                                   | high |
|             |              | L449V             | 1,3,1                     | 0     | 5              | 0                                                   | high |
| F452C       |              | 1                 | 0                         | 1     | 0              | -                                                   |      |
| V483G/A     |              | 3,8,1,2,1,4,2,1   | 0                         | 22    | 0              | high                                                |      |
| W484G       |              | 3,1               | 0                         | 4     | 0              | high                                                |      |
| D485Y/N     |              | 1,5,13            | 0                         | 19    | 0              | high                                                |      |
| I491V/T     |              | 2,1,1,3,11        | 0                         | 18    | 0              | high                                                |      |
| L516P       |              | 1                 | 0                         | 1     | 0              | -                                                   |      |
| V517L       |              | 1,1               | 0                         | 2     | 0              | high                                                |      |
| G519D       |              | 1,1,1             | 0                         | 2     | 0              | high                                                |      |
| A521D       |              | 1,1               | 0                         | 2     | 0              | high                                                |      |
| H525Q       |              | 2                 | 0                         | 2     | 0              | -                                                   |      |
| L527V       |              | 1,17              | 0                         | 18    | 0              | high                                                |      |
| R572H       |              | 1                 | 0                         | 1     | 0              | -                                                   |      |
| G594E       |              | 75                | 61                        | 10    | 4              | low                                                 |      |
| P601L       |              | 1                 | 1                         | 0     | 0              | low                                                 |      |
| T667M       |              | 3                 | 3                         | 0     | 0              | low                                                 |      |
| P678R       |              | 4                 | 0                         | 4     | 0              | -                                                   |      |
| H689R/H/S/K |              | 1,1,1,1,1,1,1,1,1 | 1                         | 8     | 0              | high                                                |      |
| A734V       |              | 1                 | 0                         | 1     | 0              | -                                                   |      |
| D747A       |              | 4                 | 0                         | 3     | 0              | -                                                   |      |
| Q761R       |              | 1                 | 0                         | 1     | 0              | -                                                   |      |
| R770H       |              | 10                | 0                         | 10    | 0              | -                                                   |      |
| E791Q       |              | 1                 | 1                         | 0     | 0              | -                                                   |      |
| N826K       |              | 1                 | 0                         | 0     | 1              | -                                                   |      |
| I832V       |              | 1                 | 0                         | 1     | 0              | -                                                   |      |
| S838C       | 1            | 0                 | 1                         | 0     | -              |                                                     |      |
| E842A       | 1            | 1                 | 0                         | 0     | -              |                                                     |      |
| L847R       | 1            | 0                 | 1                         | 0     | -              |                                                     |      |
| Y849C       | 1            | 0                 | 1                         | 0     | -              |                                                     |      |
| I885V       | 3,1,1        | 0                 | 4                         | 1     | high           |                                                     |      |
| D943G       | 3            | 0                 | 3                         | 0     | -              |                                                     |      |
| G945V       | 1            | 0                 | 1                         | 0     | -              |                                                     |      |
| P1040T/S/R  | 1,1,1,1,1    | 0                 | 5                         | 0     | high           |                                                     |      |
| I1046M      | 1            | 0                 | 1                         | 0     | -              |                                                     |      |
| E1092D      | 495          | 171               | 288                       | 36    | low            |                                                     |      |
| S1100A      | 6            | 3                 | 1                         | 2     | low            |                                                     |      |
| V1130M      | 1            | 0                 | 0                         | 1     | -              |                                                     |      |
| V1252L      | 1            | 0                 | 1                         | 0     | -              |                                                     |      |
| <i>rpoB</i> | S12T         | 5                 | 5                         | 0     | 0              | low                                                 |      |
|             | L42F         | 1                 | 0                         | 1     | 0              | -                                                   |      |
|             | P45S         | 1                 | 0                         | 1     | 0              | -                                                   |      |
|             | E82G         | 1                 | 0                         | 1     | 0              | -                                                   |      |
|             | D103E        | 1                 | 0                         | 0     | 1              | -                                                   |      |
|             | V170F        | 1                 | 1                         | 0     | 0              | -                                                   |      |
|             | D265G        | 1                 | 0                         | 0     | 1              | -                                                   |      |
|             | T399A        | 1                 | 0                         | 1     | 0              | -                                                   |      |
|             | P479T        | 1                 | 0                         | 1     | 0              | -                                                   |      |
|             | N487S        | 1                 | 0                         | 0     | 1              | -                                                   |      |
|             | I488V        | 1                 | 0                         | 1     | 0              | -                                                   |      |
|             | I491V        | 1,1               | 0                         | 2     | 0              | high                                                |      |
|             | V496M/L      | 2,7               | 0                         | 9     | 0              | high                                                |      |
|             | F503S        | 3                 | 0                         | 3     | 0              | -                                                   |      |
|             | D571A        | 1                 | 0                         | 1     | 0              | -                                                   |      |
|             | M707T        | 1                 | 1                         | 0     | 0              | low                                                 |      |
|             | H723Y        | 1                 | 0                         | 1     | 0              | -                                                   |      |
|             | L731P        | 1                 | 0                         | 1     | 0              | -                                                   |      |
|             | E761D        | 207               | 0                         | 207   | 0              | -                                                   |      |
|             | I783V        | 1                 | 1                         | 0     | 0              | low                                                 |      |
|             | R827C        | 1                 | 0                         | 1     | 0              | -                                                   |      |
|             | H835R/P      | 1,1,1             | 0                         | 2     | 1              | high                                                |      |
|             | I925V        | 3                 | 3                         | 0     | 0              | low                                                 |      |
| D1006G      | 1            | 0                 | 0                         | 1     | -              |                                                     |      |
| S1124A      | 1            | 1                 | 0                         | 0     | low            |                                                     |      |

<sup>a</sup> Codons were considered to have a high likelihood of compensatory function if they emerged independently multiple times in isolates with RRDR mutations and a low likelihood if they occurred in isolates with WT RRDR.

**Supplementary Table 9. Heterogeneity at drug resistance loci**

| Locus                     | Isolates with resistance allele | Isolates with heterogeneous alleles | Rate of heterogeneity <sup>a</sup> | 95% CI      | p <sup>b</sup> |
|---------------------------|---------------------------------|-------------------------------------|------------------------------------|-------------|----------------|
| <i>katG</i>               | 585                             | 0                                   | 0.000                              | 0.000-0.006 |                |
| <i>rpsL</i>               | 314                             | 0                                   | 0.000                              | 0.000-0.012 |                |
| P <sub><i>inhA</i></sub>  | 70                              | 0                                   | 0.000                              | 0.000-0.051 |                |
| <i>gidB</i>               | 45                              | 0                                   | 0.000                              | 0.000-0.079 |                |
| <i>rrs</i> <sub>str</sub> | 261                             | 1                                   | 0.004                              | 0.000-0.021 |                |
| <i>embB</i>               | 457                             | 2                                   | 0.004                              | 0.001-0.016 |                |
| P <sub><i>eis</i></sub>   | 317                             | 2                                   | 0.006                              | 0.001-0.023 |                |
| P <sub><i>ethA</i></sub>  | 217                             | 2                                   | 0.009                              | 0.001-0.033 |                |
| <i>rpoB</i>               | 495                             | 5                                   | 0.010                              | 0.003-0.023 |                |
| <i>ethA</i>               | 113                             | 2                                   | 0.017                              | 0.002-0.061 |                |
| <i>pncA</i>               | 303                             | 6                                   | 0.019                              | 0.007-0.042 |                |
| P <sub><i>embA</i></sub>  | 41                              | 1                                   | 0.024                              | 0.001-0.126 | 0.015          |
| <i>rrs</i> <sub>inj</sub> | 40                              | 1                                   | 0.024                              | 0.001-0.129 | 0.016          |
| P <sub><i>pncA</i></sub>  | 21                              | 2                                   | 0.087                              | 0.011-0.280 | 0.527          |
| <i>gyrA</i>               | 85                              | 18                                  | 0.175                              | 0.107-0.262 |                |
| <i>gyrB</i>               | 11                              | 3                                   | 0.214                              | 0.047-0.508 |                |

<sup>a</sup> Proportion of isolates with a mutant allele that have heterogeneous alleles

<sup>b</sup> Pearson's chi-square test comparison to *gyrA*

Supplementary Table 10. Homoplasies in the phylogeny of Samara isolates <sup>a</sup>

| Position in reference | Reference base | SNP base | Gene                    | Substitution | Position in reference | Reference base | SNP base | Gene                 | Substitution |
|-----------------------|----------------|----------|-------------------------|--------------|-----------------------|----------------|----------|----------------------|--------------|
| 698                   | G              | A        | dnaA                    | R233Q        | 764719                | C              | G        | rpoC                 | L449V        |
| 6620                  | G              | A        | gyrB                    | D461N        | 764822                | T              | C,G      | rpoC                 | V483A,G      |
| 6742                  | A              | C        | gyrB                    | E501D        | 764824                | T              | G        | rpoC                 | W484G        |
| 7563                  | G              | T        | gyrA                    | G88C         | 764827                | G              | A        | rpoC                 | D485N        |
| 7570                  | C              | T        | gyrA                    | A90V         | 764845                | A              | G        | rpoC                 | I491V        |
| 7572                  | T              | C        | gyrA                    | S91P         | 764846                | T              | C        | rpoC                 | I491T        |
| 7581                  | G              | A,T      | gyrA                    | D94N,Y       | 764930                | G              | A        | rpoC                 | G519D        |
| 7582                  | A              | C,G      | gyrA                    | D94A,G       | 764936                | C              | A        | rpoC                 | A521D        |
| 13624                 | G              | A        | intergenic <sup>c</sup> | -            | 764953                | T              | G        | rpoC                 | L527V        |
| 13636                 | T              | C        | intergenic <sup>c</sup> | -            | 765466                | A              | C        | rpoC                 | N698H        |
| 13638                 | T              | C,G      | intergenic <sup>c</sup> | -            | 765467                | A              | G        | rpoC                 | N698S        |
| 18147                 | C              | T        | pknA                    | V206I        | 765468                | C              | A        | rpoC                 | N698K        |
| 36853                 | G              | C        | acpA                    | G83R         | 766027                | A              | G        | rpoC                 | I885V        |
| 55549                 | G              | T        | ponA1                   | P629P        | 766492                | C              | T        | rpoC                 | P1040S       |
| 75233                 | C              | A        | intergenic              | -            | 766493                | C              | G        | rpoC                 | P1040R       |
| 113793                | C              | G        | nrp                     | A1265G       | 781692                | A              | G        | rpsL                 | K43R         |
| 122334                | T              | C        | Rv0104                  | F7L          | 781827                | A              | G        | rpsL                 | K88R         |
| 128620                | C              | T        | ctpl                    | A641T        | 817532                | G              | T        | sppA                 | R622L        |
| 147250                | C              | T        | fusA2                   | P174P        | 841331                | T              | C        | vapC31               | A33A         |
| 160817                | C              | T        | intergenic              | -            | 841382                | G              | A        | vapC31               | L50L         |
| 164315                | T              | C        | cyp138                  | V317A        | 841383                | G              | A        | vapC31               | A51T         |
| 218599                | T              | C        | intergenic              | -            | 841453                | C              | A        | vapC31               | T74N         |
| 222486                | C              | T        | Rv0191                  | A66A         | 841487                | T              | C        | vapC31               | G85G         |
| 244552                | A              | G        | mmpL3                   | R923R        | 841634                | G              | T        | vapC31               | S134S        |
| 255980                | G              | A        | intergenic              | -            | 841655                | G              | A        | vapC31               | P141P        |
| 284783                | G              | A        | aftD                    | R691W        | 841656                | C              | A        | vapC31               | L142I        |
| 300817                | C              | T        | intergenic              | -            | 842049                | A              | C        | Rv0750               | I4I          |
| 304904                | C              | T        | nirB                    | R679R        | 842056                | G              | A        | Rv0750               | D7N          |
| 332737                | A              | C        | vapC25                  | S134S        | 842061                | C              | T        | Rv0750               | C8C          |
| 332918                | T              | G        | vapC25                  | N74T         | 842062                | G              | T        | Rv0750               | V9F          |
| 333046                | A              | G        | vapC25                  | L31L         | 842063                | T              | A        | Rv0750               | V9D          |
| 333088                | A              | G        | vapC25                  | H17H         | 842068                | C              | G        | Rv0750               | H11D         |
| 333211                | A              | G        | vapB25                  | V70A         | 842070                | C              | G        | Rv0750               | H11Q         |
| 342091                | T              | C        | intergenic              | -            | 842116                | C              | G        | Rv0750               | L27V         |
| 390986                | C              | T        | Rv0323c <sup>c</sup>    | G90S         | 902554                | G              | A        | purF                 | A147T        |
| 448551                | C              | T        | Rv0371c                 | R29Q         | 908191                | T              | C        | sseC2                | T100A        |
| 471671                | A              | G        | ndhA                    | M325T        | 911522                | C              | T        | Rv0818               | D182D        |
| 479779                | C              | T        | intergenic              | -            | 916768                | C              | T        | Rv0823c              | G295D        |
| 485307                | G              | T        | fadD30 <sup>c</sup>     | R442S        | 941757                | C              | T        | Rv0845               | A188V        |
| 497388                | C              | T        | glnH                    | T306T        | 972799                | G              | A        | Rv0874c              | L305L        |
| 506572                | C              | T        | lpqM                    | A494A        | 974009                | C              | T        | Rv0875c              | Q97Q         |
| 569846                | C              | T        | intergenic              | -            | 1041451               | C              | T        | pstB                 | T61M         |
| 612556                | G              | A        | Rv0520                  | P99P         | 1048110               | A              | C        | ligD                 | S657R        |
| 617698                | G              | C        | ccdA                    | W67C         | 1094544               | T              | C,G      | intergenic           | -            |
| 631400                | A              | G        | Rv0538                  | P452P        | 1094713               | T              | C        | Rv0979c              | D53G         |
| 631403                | G              | C        | Rv0538                  | T453T        | 1103338               | T              | G        | Rv0987               | L264R        |
| 684381                | T              | C,G      | intergenic              | -            | 1164577               | A              | G        | intergenic           | -            |
| 690172                | C              | T        | mce2C                   | P370L        | 1254138               | T              | C        | Rv1129c <sup>c</sup> | E135G        |
| 731903                | T              | G        | intergenic              | -            | 1338071               | T              | C        | Rv1194c              | I151V        |
| 761100                | T              | C        | rpoB                    | L430P        | 1340665               | A              | G        | intergenic           | -            |
| 761114                | G              | T        | rpoB                    | D435Y        | 1340675               | A              | G        | esxK                 | S3S          |
| 761115                | A              | T,G      | rpoB                    | D435V,G      | 1341072               | A              | T        | esxL                 | Q20L         |
| 761144                | C              | A,T,G    | rpoB                    | H445N,Y,D    | 1341081               | T              | C        | esxL                 | L23S         |
| 761145                | A              | T,G      | rpoB                    | H445L,R      | 1341168               | G              | A        | esxL                 | G52E         |
| 761160                | C              | T        | rpoB                    | S450L        | 1341182               | T              | C        | esxL                 | L57L         |
| 761166                | T              | C        | rpoB                    | L452P        | 1341262               | G              | A        | esxL                 | A83A         |
| 761282                | A              | G        | rpoB                    | I491V        | 1341303               | A              | T,G      | intergenic           | -            |
| 762315                | A              | G        | rpoB                    | H835R        | 1342728               | T              | C,G      | intergenic           | -            |
| 764665                | G              | A        | rpoC                    | V431M        | 1349383               | T              | G        | fadD6                | I15S         |
| 764708                | A              | G        | rpoC                    | K445R        | 1357122               | C              | T        | intergenic           | -            |

## Homoplasies in the phylogeny of Samara isolates (cont.)

| Position in reference | Reference base | SNP base | Gene              | Substitution | Position in reference | Reference base | SNP base | Gene              | Substitution |
|-----------------------|----------------|----------|-------------------|--------------|-----------------------|----------------|----------|-------------------|--------------|
| 1380580               | T              | A        | sugB              | S240T        | 2289112               | T              | C        | pncA              | T47A         |
| 1404177               | T              | G        | cyp130            | K145N        | 2289231               | A              | C        | pncA              | V7G          |
| 1441541               | C              | G        | Rv1288            | D62E         | 2289240               | A              | C        | pncA              | L4W          |
| 1472367               | A              | C,T      | rrs               | 514          | 2289261               | T              | A,C,G    | intergenic        | -            |
| 1472370               | C              | T        | rrs               | 517          | 2296051               | G              | C        | pk12              | P3649A       |
| 1472759               | A              | G        | rrs               | 906          | 2300246               | A              | G        | pk12              | A2250A       |
| 1473254               | A              | G        | rrs               | 1401         | 2300561               | T              | G        | pk12              | P2145P       |
| 1490812               | C              | T        | glgB              | P503P        | 2300564               | A              | G        | pk12              | D2144D       |
| 1552555               | G              | A        | Rv1378c           | R37W         | 2306315               | A              | G        | pk12              | A227A        |
| 1576489               | T              | G        | lipI              | T106P        | 2338686               | T              | C        | intergenic        | -            |
| 1614824               | A              | G        | pgk               | K163R        | 2338688               | C              | T        | intergenic        | -            |
| 1673433               | C              | T        | intergenic        | -            | 2338921               | A              | C        | Rv2082            | R68R         |
| 1673440               | T              | A,C,G    | intergenic        | -            | 2339269               | C              | T        | Rv2082            | P184P        |
| 1674056               | G              | A        | fabG1             | L203L        | 2339308               | T              | G        | Rv2082            | S197S        |
| 1674489               | T              | G        | inhA <sup>c</sup> | S94A         | 2339309               | A              | C        | Rv2082            | M198L        |
| 1675181               | C              | T        | hemZ              | P53S         | 2339310               | T              | C        | Rv2082            | M198T        |
| 1761773               | G              | A        | mmpL6             | G8S          | 2363691               | C              | A        | Rv2102            | P98T         |
| 1774087               | G              | T        | Rv1566c           | P181Q        | 2372502               | C              | G        | dop               | R26P         |
| 1791608               | T              | C        | Rv1591            | S11P         | 2372559               | G              | C        | dop               | P7R          |
| 1813611               | C              | T        | lgt               | L145F        | 2381038               | G              | T        | intergenic        | -            |
| 1840310               | A              | G        | Rv1634            | I379V        | 2439213               | A              | G        | intergenic        | -            |
| 1841444               | T              | G        | Rv1635c           | I269I        | 2444629               | T              | G        | Rv2182c           | D237A        |
| 1902386               | T              | C        | intergenic        | -            | 2531618               | A              | G        | Rv2258c           | R96R         |
| 1934022               | C              | T        | intergenic        | -            | 2563472               | C              | T        | sseB              | D97D         |
| 2030363               | A              | G        | esxM              | S3S          | 2625836               | C              | T        | intergenic        | -            |
| 2030529               | T              | C        | esxM              | *59Q         | 2625932               | T              | C        | esxO              | A83A         |
| 2030856               | A              | G        | esxN              | E52G         | 2626113               | A              | G        | esxO              | L23S         |
| 2030950               | G              | A        | esxN              | A83A         | 2626116               | C              | G        | esxO              | G22A         |
| 2074466               | G              | C        | intergenic        | -            | 2626118               | G              | C        | esxO              | A21A         |
| 2108611               | C              | G        | apa               | P290A        | 2626686               | A              | C        | Rv2348c           | I101M        |
| 2122403               | C              | T        | lldD2             | V253M        | 2643278               | G              | A        | Rv2361c           | L67L         |
| 2123141               | C              | T        | lldD2             | V7M          | 2700247               | G              | A        | Rv2402            | V571M        |
| 2123153               | C              | T        | lldD2             | V3I          | 2703923               | C              | T        | intergenic        | -            |
| 2123154               | C              | T        | lldD2             | A2A          | 2703959               | G              | A        | intergenic        | -            |
| 2123168               | C              | T        | intergenic        | -            | 2703971               | C              | T        | intergenic        | -            |
| 2123170               | A              | T        | intergenic        | -            | 2703980               | T              | C        | intergenic        | -            |
| 2123177               | T              | G        | intergenic        | -            | 2715350               | C              | T        | intergenic        | -            |
| 2123189               | C              | T        | Rv1873            | S3L          | 2715352               | G              | A        | intergenic        | -            |
| 2123190               | A              | C        | Rv1873            | S3S          | 2715354               | G              | A        | intergenic        | -            |
| 2132768               | C              | T        | Rv1882c           | A148A        | 2715355               | G              | C        | intergenic        | -            |
| 2142407               | C              | T        | intergenic        | -            | 2715377               | C              | A        | intergenic        | -            |
| 2155176               | C              | T,G      | katG              | S315N,T      | 2726149               | C              | T        | intergenic        | -            |
| 2158913               | C              | A        | fadB5             | G63*         | 2726153               | G              | A        | intergenic        | -            |
| 2174224               | A              | G        | Rv1922            | V50V         | 2747159               | T              | C        | folC <sup>c</sup> | S150G        |
| 2187314               | G              | A        | intergenic        | -            | 2747203               | T              | G        | folC <sup>c</sup> | D135A        |
| 2195930               | T              | C        | Rv1944c           | T5A          | 2747479               | A              | G        | folC <sup>c</sup> | I43T         |
| 2195931               | A              | C        | Rv1944c           | D4E          | 2747488               | T              | C        | folC <sup>c</sup> | E40G         |
| 2207533               | C              | T        | intergenic        | -            | 2765896               | G              | A        | lipP              | T78T         |
| 2212447               | T              | G        | mce3C             | A271A        | 2778964               | G              | A        | gdh               | L1103L       |
| 2277281               | A              | G        | Rv2030c           | Y405Y        | 2828497               | C              | G        | intergenic        | -            |
| 2288736               | A              | G        | pncA              | L172P        | 2828498               | G              | A        | intergenic        | -            |
| 2288748               | G              | A        | pncA              | T168I        | 2828501               | G              | A        | intergenic        | -            |
| 2288848               | T              | G        | pncA              | T135P        | 2829926               | T              | C,G      | intergenic        | -            |
| 2288868               | A              | C        | pncA              | V128G        | 2863716               | C              | T        | aroF              | G235G        |
| 2288947               | C              | T        | pncA              | A102T        | 2867764               | T              | C        | lppB              | I211I        |
| 2288953               | T              | G        | pncA              | T100P        | 2881463               | A              | G        | Rv2561            | Y16C         |
| 2288971               | A              | G        | pncA              | F94L         | 2881480               | T              | G        | Rv2561            | W22G         |
| 2289039               | T              | C        | pncA              | H71R         | 2886547               | G              | A        | Rv2566            | R56H         |
| 2289049               | A              | C        | pncA              | W68G         | 2932443               | G              | A        | tesB2             | D236D        |
| 2289109               | T              | C        | pncA              | K48E         | 2953260               | G              | A        | intergenic        | -            |

## Homoplasies in the phylogeny of Samara isolates (cont.)

| Position in reference | Reference base | SNP base | Gene                    | Substitution | Position in reference | Reference base | SNP base | Gene                    | Substitution |
|-----------------------|----------------|----------|-------------------------|--------------|-----------------------|----------------|----------|-------------------------|--------------|
| 2982964               | A              | C,G      | Rv2665                  | P86P,P       | 3691013               | A              | G        | intergenic              | -            |
| 2986835               | G              | A        | Rv2670c                 | A5V          | 3691069               | A              | C        | intergenic              | -            |
| 2995856               | G              | A        | echA15                  | G245E        | 3700229               | G              | A        | Rv3312c                 | T37I         |
| 3034771               | T              | C        | Rv2722                  | Y43Y         | 3774269               | C              | T        | Rv3363c                 | V82M         |
| 3035380               | G              | A        | Rv2723                  | S155N        | 3793110               | G              | A        | Rv3378c                 | D49D         |
| 3074238               | T              | C        | thyA                    | D81G         | 3798070               | G              | T        | idsB                    | T143K        |
| 3075294               | G              | A        | Rv2765                  | A217A        | 3823870               | A              | G        | Rv3403c                 | M1T          |
| 3089259               | G              | A        | pepR                    | R371W        | 3831629               | G              | A        | intergenic              | -            |
| 3095501               | T              | C        | Rv2787                  | I128T        | 3855220               | T              | C        | glmS                    | I560V        |
| 3098318               | A              | G        | fadE21                  | L210P        | 3877946               | T              | C        | rpoA                    | D190G        |
| 3112885               | G              | A        | Rv2804c                 | A73V         | 3877956               | T              | C,G      | rpoA                    | T187A,P      |
| 3130012               | C              | T        | Rv2823c                 | L590L        | 3895891               | G              | T        | Rv3479                  | G22V         |
| 3135644               | T              | C        | intergenic              | -            | 4001629               | T              | C        | intergenic              | -            |
| 3136343               | G              | A        | Rv2828A                 | R89W         | 4016427               | A              | G        | intergenic              | -            |
| 3173115               | G              | A        | intergenic              | -            | 4030699               | G              | C        | mutY                    | V67L         |
| 3175449               | G              | A        | intergenic              | -            | 4060596               | T              | C        | esxW                    | T2A          |
| 3177552               | T              | C        | relF                    | I3T          | 4087503               | A              | G        | intergenic              | -            |
| 3189531               | C              | T        | intergenic              | -            | 4214150               | T              | C        | Rv3768                  | L25P         |
| 3224892               | G              | T        | ffh                     | R468S        | 4243197               | G              | C        | intergenic              | -            |
| 3247324               | C              | G        | ppsA                    | D624E        | 4243224               | C              | A,T,G    | intergenic              | -            |
| 3248082               | G              | A        | ppsA                    | R877H        | 4243228               | C              | T        | intergenic              | -            |
| 3248083               | C              | T        | ppsA                    | R877R        | 4247436               | A              | C,G      | embB                    | M306L,V      |
| 3251428               | G              | A        | ppsB                    | A117T        | 4247438               | G              | A,C,T    | embB                    | M306I,I,I    |
| 3253560               | G              | A        | ppsB                    | E827E        | 4247476               | A              | G        | embB                    | Y319C        |
| 3266777               | A              | C        | ppsD                    | I1508L       | 4247581               | A              | C        | embB                    | D354A        |
| 3297348               | G              | A        | pkc15 <sup>c</sup>      | T167T        | 4247653               | A              | C        | embB                    | E378A        |
| 3343419               | C              | T        | hupB                    | R137K        | 4247737               | G              | A,C      | embB                    | G406D,A      |
| 3430088               | G              | A        | Rv3064c                 | A57A         | 4248009               | C              | A        | embB                    | Q497K        |
| 3446707               | C              | G        | Rv3081                  | F220L        | 4248010               | A              | G        | embB                    | Q497R        |
| 3448009               | T              | C        | virS                    | G142G        | 4249525               | A              | G        | embB                    | H1002R       |
| 3477274               | T              | C        | Rv3108                  | R69R         | 4249590               | G              | A        | embB                    | D1024N       |
| 3500157               | G              | A        | Rv3134c                 | L201L        | 4252886               | C              | T        | intergenic              | -            |
| 3534196               | G              | A        | Rv3165c                 | L70F         | 4269096               | C              | T        | ubiA <sup>c</sup>       | A249T        |
| 3538160               | G              | A        | Rv3169                  | K305K        | 4269305               | A              | G        | ubiA <sup>c</sup>       | I179T        |
| 3555465               | G              | A        | Rv3190c                 | P411S        | 4313163               | G              | A        | Rv3839                  | R131Q        |
| 3568767               | T              | G        | intergenic              | -            | 4322607               | G              | A        | Rv3848                  | S92N         |
| 3600338               | G              | A        | Rv3224                  | T160T        | 4327072               | A              | G        | ethA                    | C137R        |
| 3625949               | G              | A        | mtrB                    | L225L        | 4327487               | A              | G        | intergenic              | -            |
| 3640324               | A              | G        | intergenic <sup>c</sup> | -            | 4338372               | A              | G        | whiB6 <sup>c</sup>      | C53R         |
| 3640416               | T              | G        | intergenic <sup>c</sup> | -            | 4338607               | A              | C        | intergenic <sup>c</sup> | -            |
| 3679971               | C              | T        | lhr                     | G1063G       | 4338609               | T              | A        | intergenic <sup>c</sup> | -            |
| 3680940               | G              | A        | lhr                     | P1386P       | 4359172               | G              | C        | espK                    | T206T        |
| 3681535               | G              | A        | nei                     | G70S         | 4371255               | G              | A        | eccD2                   | A146V        |
| 3690955               | A              | G        | intergenic              | -            | 4398755               | G              | A        | Rv3910                  | G718S        |
| 3691011               | C              | A        | intergenic              | -            |                       |                |          |                         |              |

<sup>a</sup> Sites for which >5% isolates had an ambiguous basecall were excluded.

<sup>b</sup> Novel regions putatively associated with drug resistance identified by Farhat et al.<sup>14</sup>

<sup>c</sup> Novel regions putatively associated with drug resistance identified by Zhang et al.<sup>15</sup>



**Supplementary Table 11: Comparison of clustering rate of drug resistance SNPs**

| Locus                    | Number of isolates |           | P                   |
|--------------------------|--------------------|-----------|---------------------|
|                          | unclustered        | clustered |                     |
| <i>katG</i>              | 27                 | 558       | <0.001 <sup>a</sup> |
| <i>P<sub>inhA</sub></i>  | 19                 | 51        | <0.001 <sup>a</sup> |
| <i>rpoB</i>              | 62                 | 448       | <0.001 <sup>a</sup> |
| <i>P<sub>pncA</sub></i>  | 11                 | 10        | 0.758               |
| <i>pncA</i>              | 67                 | 238       | <0.001 <sup>a</sup> |
| <i>P<sub>embA</sub></i>  | 16                 | 25        | 0.047 <sup>a</sup>  |
| <i>embB</i>              | 49                 | 415       | <0.001 <sup>a</sup> |
| <i>rpsL</i>              | 19                 | 295       | <0.001 <sup>a</sup> |
| <i>rrs<sub>str</sub></i> | 7                  | 255       | <0.001 <sup>a</sup> |
| <i>gidB</i>              | 17                 | 30        | 0.007 <sup>a</sup>  |
| <i>rrs<sub>inj</sub></i> | 18                 | 22        | 0.371               |
| <i>P<sub>eis</sub></i>   | 38                 | 284       | <0.001 <sup>a</sup> |
| <i>gyrA</i>              | 52                 | 34        | 0.006 <sup>b</sup>  |
| <i>gyrB</i>              | 7                  | 4         | 0.395               |
| <i>P<sub>ethA</sub></i>  | 0                  | 216       | <0.001 <sup>a</sup> |
| <i>ethA</i>              | 20                 | 95        | <0.001 <sup>a</sup> |

<sup>a</sup> SNPs were significantly more likely to be found in phylogenetic clusters

<sup>b</sup> SNPs were significantly less likely to be found in phylogenetic clusters

## References

1. Petrella, S. *et al.* Crystal structure of the pyrazinamidase of *Mycobacterium tuberculosis*: insights into natural and acquired resistance to pyrazinamide. *PLOS ONE* **6**, e15785 (2011).
